# Supplementary material for: Significant enhancement of piezoelectricity induced by oxygen adsorption in monolayer and multilayer MoS2
Source: Royal Society of Chemistry journal article supplement (doi:10.1039/d2tc02672d), 2022-01-01
Supplement: d2tc02672d1.pdf [file d2tc02672d1.pdf]

## Significant enhancement of piezoelectricity induced by oxygen adsorption in monolayer and multilayer MoS<sub>2</sub>

Xinxin Wang<sup>1,2</sup>, Haobo Liu<sup>1</sup>, Gaojie Li<sup>1</sup>, Guanghou Wang<sup>2</sup>, Jianguo Wan<sup>2,\*</sup>

<sup>1</sup>School of Physics and Engineering, and Henan Key Laboratory of Photoelectric Energy Storage Materials and Applications, Henan University of Science and Technology, Luoyang 471023, China.

<sup>2</sup>National Laboratory of Solid State Microstructures, Nanjing University, Nanjing 210093, China.

---

\* Corresponding authors.  
E-mail addresses: wanjg@nju.edu.cn (J. Wan).

## I. The structural and electronic properties of O@MoS<sub>2</sub> under different O concentration.

Fig. S1 (a) – (d) display the energetically favorable structures of MoS<sub>2</sub> with O adsorption concentration of 16.667%, 33.333%, 66.667% and 83.333%, corresponding to two, four, eight, and ten S atoms adsorbed by O atoms in 2×3 supercell respectively.

As the concentration increases, the lattice parameters of armchair and zigzag direction are increased gradually as shown in Fig. S3 (a). Nevertheless, the band gap is decreased with the increment of concentration as displayed in Fig. S3 (b).

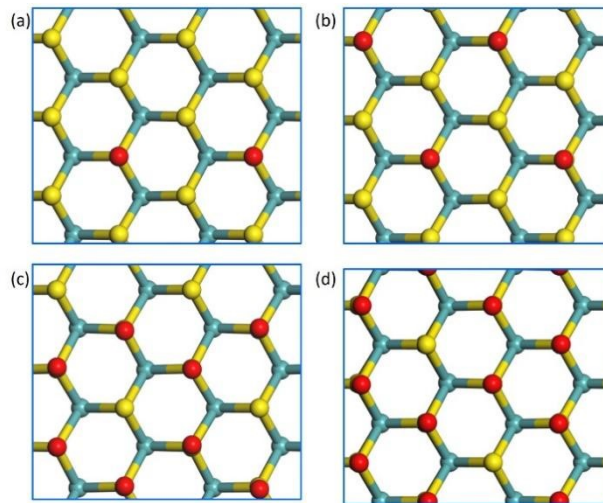

Fig. S1 (a)-(d) The energetically favorable structures of MoS<sub>2</sub> with O adsorption concentration of 16.667% (2O), 33.333% (4O), 66.667% (8O) and 83.333% (10O).

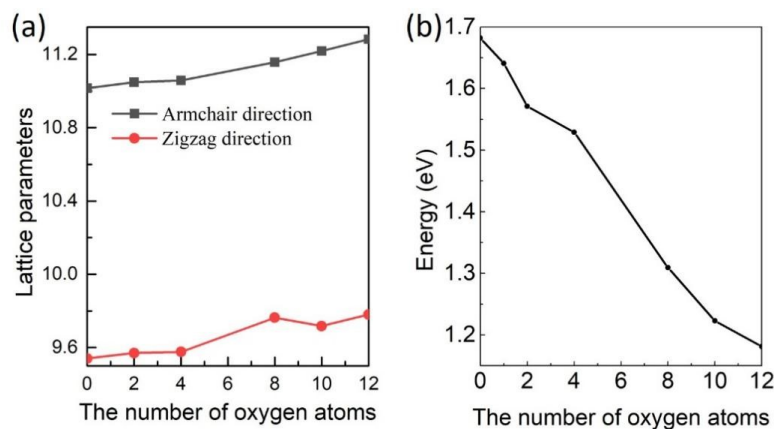

Fig. S2 (a) The lattice parameters of O@MoS<sub>2</sub> as functions of O adsorption concentration; (b) The band gap variation of O@MoS<sub>2</sub> as a function of O adsorption concentration.

## II. The possible stacking sequences of O@MoS<sub>2</sub>/MoS<sub>2</sub>.

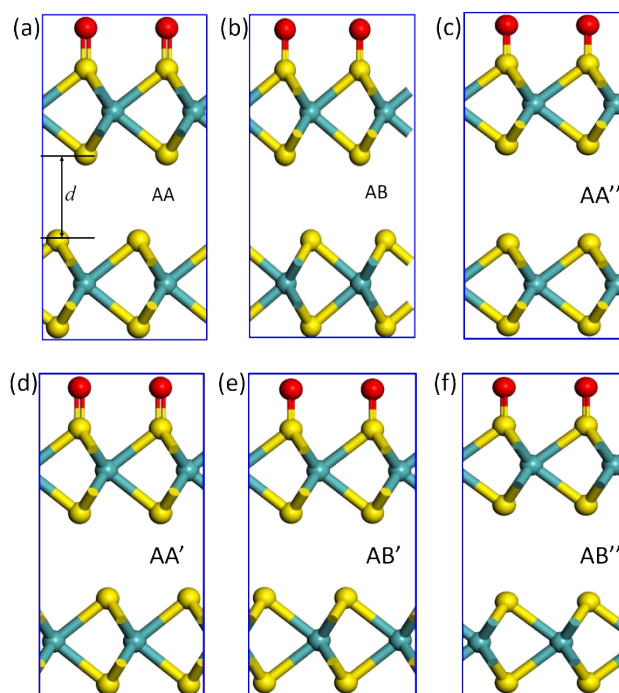

Fig. S3 (a)-(f) The stacking sequences of O@MoS<sub>2</sub>/MoS<sub>2</sub>.

## III. The interlayer distances of AA and AB stackings under different O concentration.

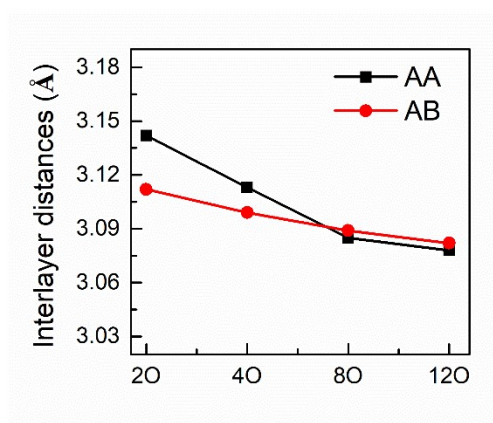

Fig. S4 The interlayer distances of AA and AB stackings under different O concentration.

#### IV. The AAA stacking of trilayer MoS<sub>2</sub> and the charge transfer of AA''.

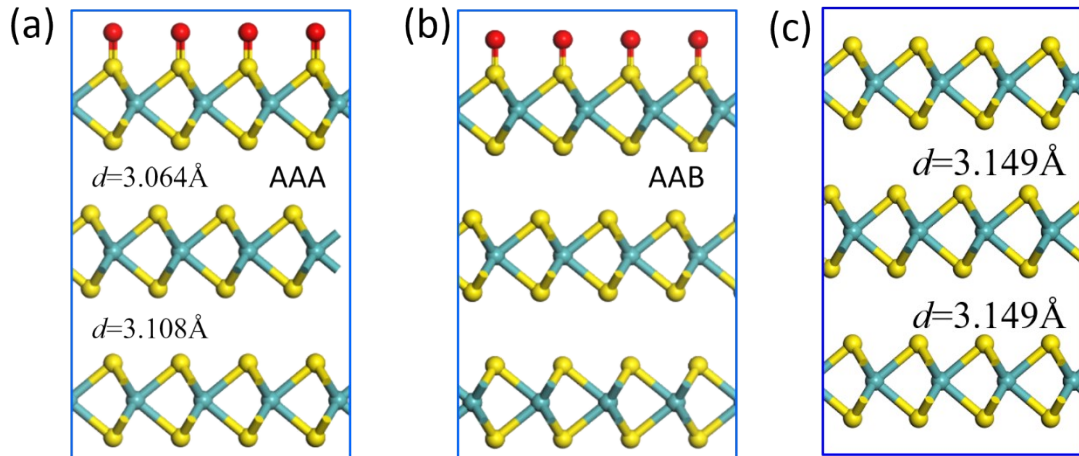

Fig. S5 (a) The structure of AAA stacking, the interlayer distances are shown in (a); (b) the structure of AAB stacking; (c) the structure of AAA stacking for pure MoS<sub>2</sub>.

#### V. The piezoelectric coefficients $e_{11}$ and $d_{11}$ of pristine multilayer MoS<sub>2</sub>.

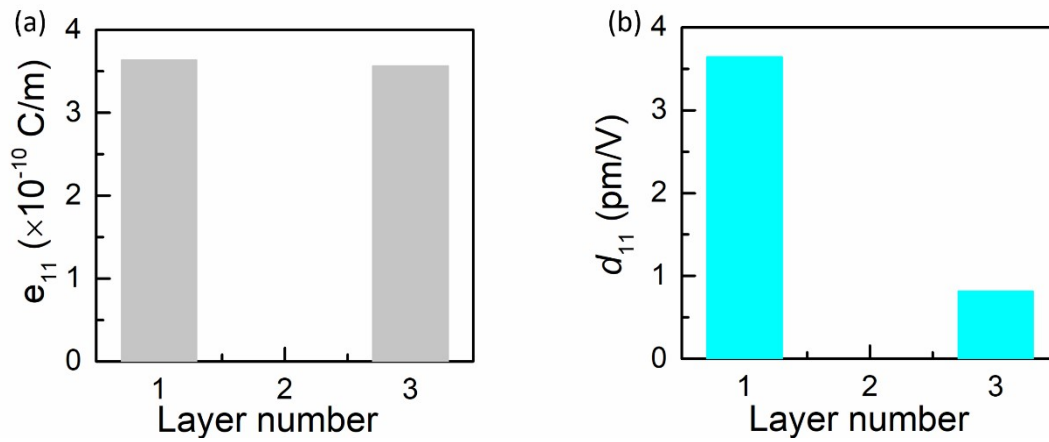

Fig. S6 The piezoelectric coefficients  $e_{11}$  (a) and  $d_{11}$  (b) of pristine multilayer MoS<sub>2</sub>.

## VI. The AA'' stacking and the charge transfer in AA''.

Fig. S7 shows the charge transfer in bilayer AA''. The overall trend is same with AA and AA', but there 0.005e has been transferred from Mo<sub>1</sub> to O<sub>1</sub>, obviously larger than that in AA and AA'. The  $d_{33}$  is obtained as 20.409 pm/V, which is ten times as great as that of AA.

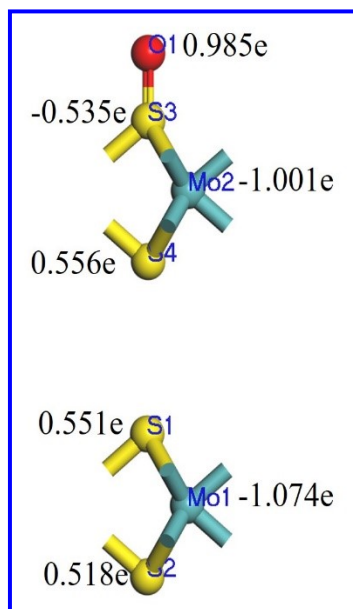

Fig. S7 the charge transfer of AA'' stacking.

## VII. The structure of trilayer MoS<sub>2</sub> with the top layer full oxygen adsorption and the middle layer partial oxygen adsorption.

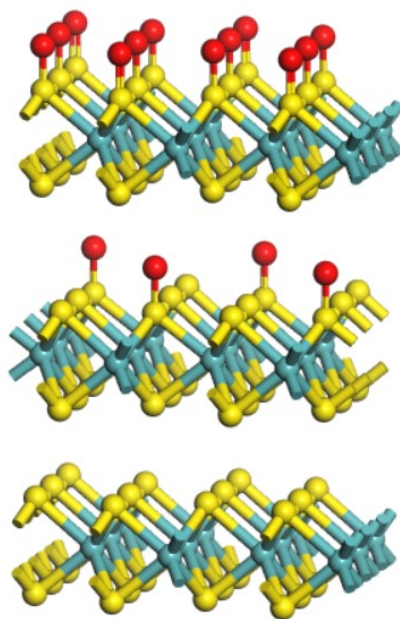

Fig. S8 The structure of trilayer MoS<sub>2</sub> with the top layer full O adsorption and the middle layer partial O adsorption.
